# Supplementary material for: Synthesis and evaluation of a tetra[6,7]quinoxalinoporphyrazine-based near infrared photosensitizer
Source: Royal Society of Chemistry journal article supplement (doi:10.1039/c7ra06348b), 2017-01-01
Supplement: c7ra06348b1.pdf [file c7ra06348b1.pdf]

### Supporting Information

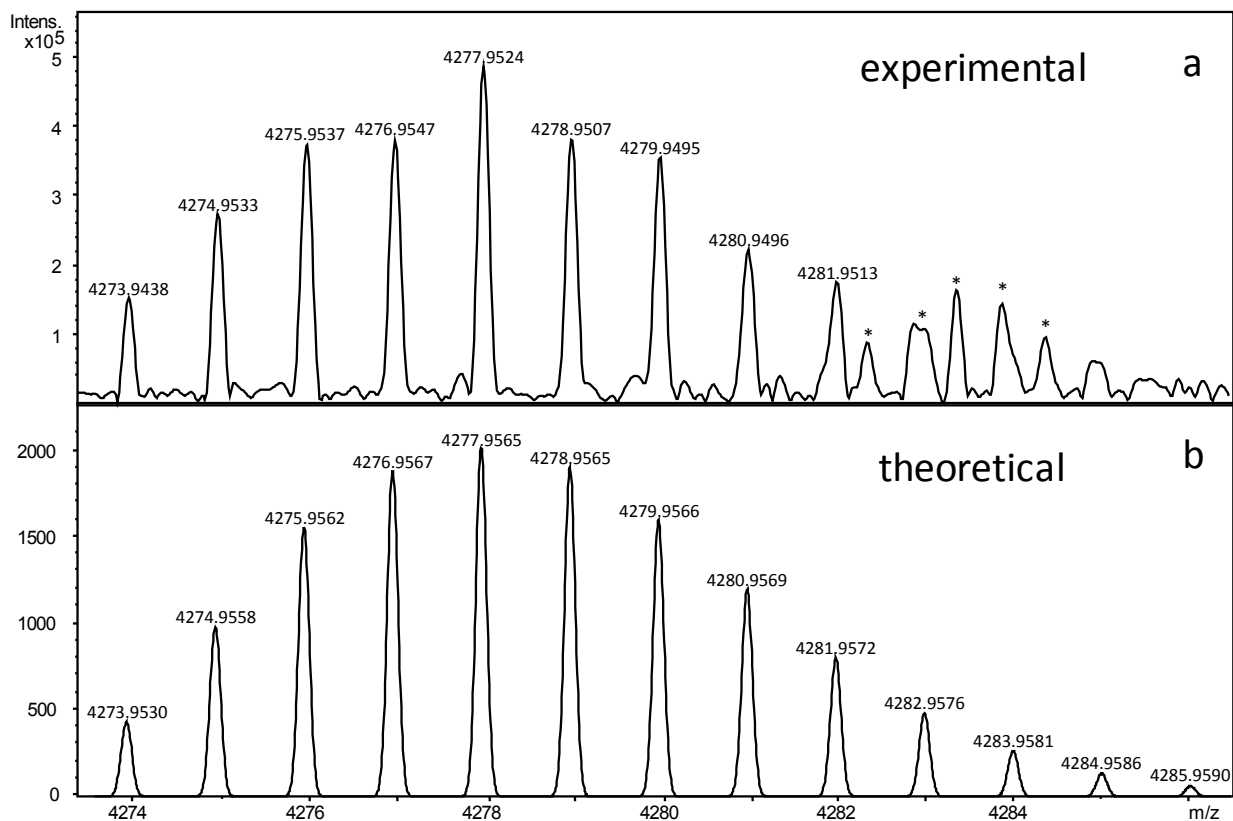

**Figure S1:** (MALDI-FTICR) mass spectra of (a) TQP3 (peaks with \* are from an internal calibration standard, doubly charged ubiquitin) and (b) theoretical spectral distribution of compound ( $C_{184}H_{176}N_{48}O_{56}S_8Zn$ ). The highest intensity signal from the synthesized compound (Figure S1a) measured at  $m/z$  4277.9524 was compared to the theoretically calculated value at  $m/z$  4277.9565 in Figure S1b which corresponds to <1 ppm error.

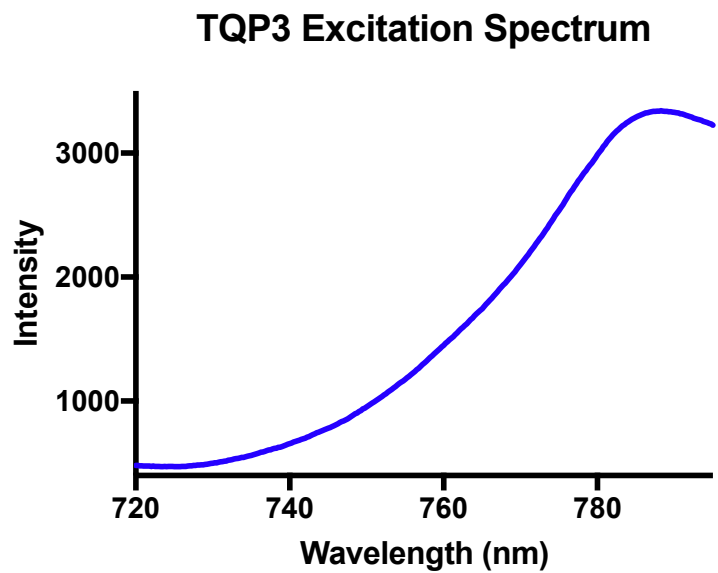

Figure S2. Excitation spectrum of TQP3 in DMSO with the emission at 800 nm.

*Supporting Information*

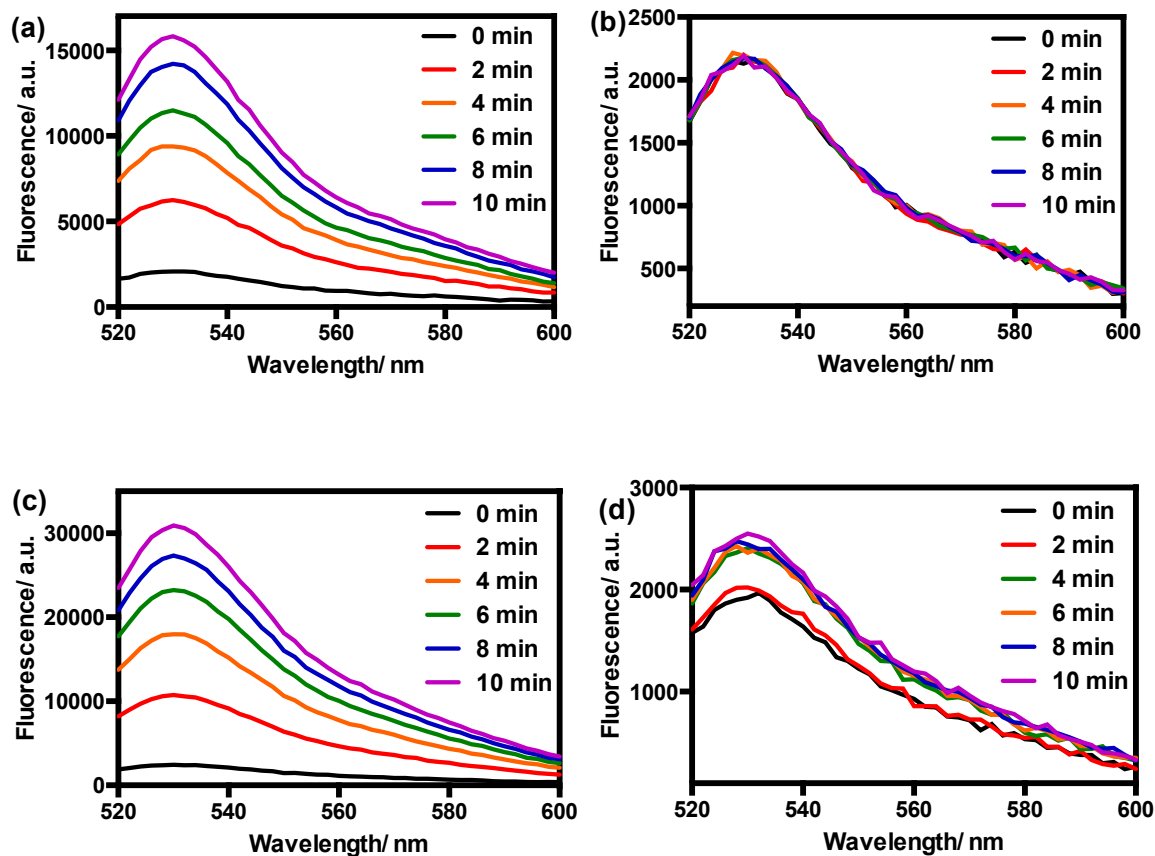

**Fig. S3** The emission spectra change of SOSG (5 $\mu$ M) treated with TQP3-Na (1 $\mu$ M) incorporated in 0.01% Kolliphor RH40 in (a) RPMI with irradiation at 780 nm, (b) RPMI without light irradiation, (c) saline with irradiation at 780 nm, and (d) saline without light irradiation.

*Supporting Information*

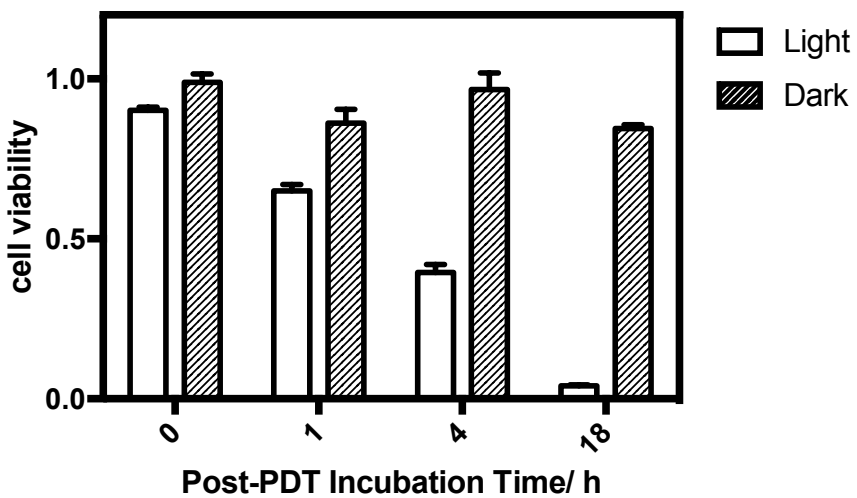

**Fig. S4** The effect of post-PDT incubation time on the cell viability after treatment of **TQP3-Na-M** ( $5\mu\text{M}$  TQP3-Na) and 30-minute NIR light irradiation.
